# Supplementary material for: Impact of selenization with NaCl treatment on the physical properties and solar cell performance of crack-free Cu(In,Ga)Se 2 microcrystal absorbers
Source: Royal Society of Chemistry journal article supplement (doi:10.1039/d3ra05829h), 2024-01-01
Supplement: d3ra05829h1.pdf [file d3ra05829h1.pdf]

## Supplementary Information

### Significance of selenization with NaCl treatment on the physical properties and solar cell performance of crack-free Cu(In,Ga)Se<sub>2</sub> microcrystals absorber

Latha Marasamy,<sup>\*a</sup> Aruna-Devi Rasu Chettiar,<sup>a</sup> Ravichandran Manisekaran,<sup>b</sup> Evangeline Linda,<sup>a</sup> Md. Ferdous Rahman,<sup>c</sup> M. Khalid Hossain,<sup>d</sup> Claudia Elena Pérez García,<sup>a</sup> José Santos-Cruz,<sup>a</sup> Velumani Subramaniam<sup>e</sup> and Francisco de Moure Flores<sup>a</sup>

<sup>a</sup>Facultad de Química, Materiales-Energía, Universidad Autónoma de Querétaro (UAQ), Santiago de Querétaro, Querétaro, C.P. 76010, México, <sup>b</sup>Interdisciplinary Research Laboratory (LII), Nanostructures and Biomaterials Area, Escuela Nacional de Estudios Superiores Unidad León, Universidad Nacional Autónoma de México (UNAM), Predio el Saucillo y el Potrero, Comunidad de los Tepetates, León, C.P. 37684, México, <sup>c</sup>Advanced Energy Materials and Solar Cell Research Laboratory, Department of Electrical and Electronic Engineering, Begum Rokeya University, Rangpur 5400, Bangladesh. <sup>d</sup>Institute of Electronics, Atomic Energy Research Establishment, Bangladesh Atomic Energy Commission, Dhaka 1349, Bangladesh. <sup>e</sup>Departamento de Ingeniería Eléctrica (SEES), Centro de Investigación y de Estudios Avanzados del Instituto Politécnico Nacional (CINVESTAV-IPN), Av. IPN 2508, San Pedro Zacatenco, Ciudad de México, C.P. 07360, México.

\*Corresponding author email-id: [latha.marasamy@uaq.mx](mailto:latha.marasamy@uaq.mx)

**Table S1.** EDS composition of thin film with respect to CIGSe MCs powder concentration along with annealing temperature.

| Coating conditions | CIGSe MCs powder concentration (mg) | Composition (at %) |       |      |       | Cu/(In+Ga) | Ga/(In+Ga) |
|--------------------|-------------------------------------|--------------------|-------|------|-------|------------|------------|
|                    |                                     | Cu                 | In    | Ga   | Se    |            |            |
| As-coated          | 100                                 | 22.81              | 18.18 | 7.40 | 51.61 | 0.89       | 0.29       |
|                    | 75                                  | 22.85              | 18.22 | 7.35 | 51.58 | 0.89       | 0.29       |
|                    | 50                                  | 22.98              | 17.79 | 7.71 | 51.52 | 0.90       | 0.30       |
| An@350°C           | 100                                 | 22.79              | 18.13 | 7.28 | 51.80 | 0.90       | 0.29       |
|                    | 75                                  | 22.91              | 18.19 | 7.65 | 51.25 | 0.89       | 0.30       |
|                    | 50                                  | 23.15              | 17.96 | 7.80 | 51.09 | 0.90       | 0.30       |

|          |     |       |       |      |       |      |      |
|----------|-----|-------|-------|------|-------|------|------|
| An@400°C | 100 | 23.09 | 18.06 | 7.51 | 51.34 | 0.90 | 0.29 |
|          | 75  | 23.01 | 18.01 | 7.63 | 51.35 | 0.90 | 0.30 |
|          | 50  | 22.95 | 18.19 | 7.71 | 51.15 | 0.89 | 0.30 |

**Table S2** The comprehensive solar cell parameters of five CIGSe MCs devices in each condition

| <b>An@350°C</b> | <b>V<sub>oc</sub> (V)</b> | <b>J<sub>sc</sub> (mA/cm<sup>2</sup>)</b> | <b>FF (%)</b> | <b>PCE (%)</b> |
|-----------------|---------------------------|-------------------------------------------|---------------|----------------|
| Solar Cell 1    | 0.602                     | 10.54                                     | 45.70         | 2.90           |
| Solar Cell 2    | 0.613                     | 12.51                                     | 42.12         | 3.23           |
| Solar Cell 3    | 0.604                     | 10.56                                     | 48.13         | 3.07           |
| Solar Cell 4    | 0.627                     | 10.33                                     | 44.00         | 2.85           |
| Solar Cell 5    | 0.610                     | 12.96                                     | 37.19         | 2.94           |
| Average         | 0.611                     | 11.38                                     | 43.43         | 3.00           |

| <b>Se@500°C</b> | <b>V<sub>oc</sub> (V)</b> | <b>J<sub>sc</sub> (mA/cm<sup>2</sup>)</b> | <b>FF (%)</b> | <b>PCE (%)</b> |
|-----------------|---------------------------|-------------------------------------------|---------------|----------------|
| Solar Cell 1    | 0.600                     | 13.73                                     | 49.65         | 4.09           |
| Solar Cell 2    | 0.613                     | 13.21                                     | 49.03         | 3.97           |
| Solar Cell 3    | 0.632                     | 12.83                                     | 46.86         | 3.80           |
| Solar Cell 4    | 0.615                     | 12.92                                     | 49.33         | 3.92           |
| Solar Cell 5    | 0.639                     | 13.23                                     | 48.85         | 4.13           |
| Average         | 0.620                     | 13.18                                     | 48.74         | 3.98           |

| <b>Se@500°C with NaCl</b> | <b>V<sub>oc</sub> (V)</b> | <b>J<sub>sc</sub> (mA/cm<sup>2</sup>)</b> | <b>FF (%)</b> | <b>PCE (%)</b> |
|---------------------------|---------------------------|-------------------------------------------|---------------|----------------|
| Solar Cell 1              | 0.645                     | 16.64                                     | 46.59         | 5.00           |
| Solar Cell 2              | 0.683                     | 17.87                                     | 44.08         | 5.38           |
| Solar Cell 3              | 0.669                     | 16.49                                     | 44.42         | 4.90           |
| Solar Cell 4              | 0.674                     | 14.07                                     | 51.67         | 4.90           |
| Solar Cell 5              | 0.686                     | 16.68                                     | 50.16         | 5.74           |
| Average                   | 0.671                     | 16.35                                     | 47.38         | 5.18           |

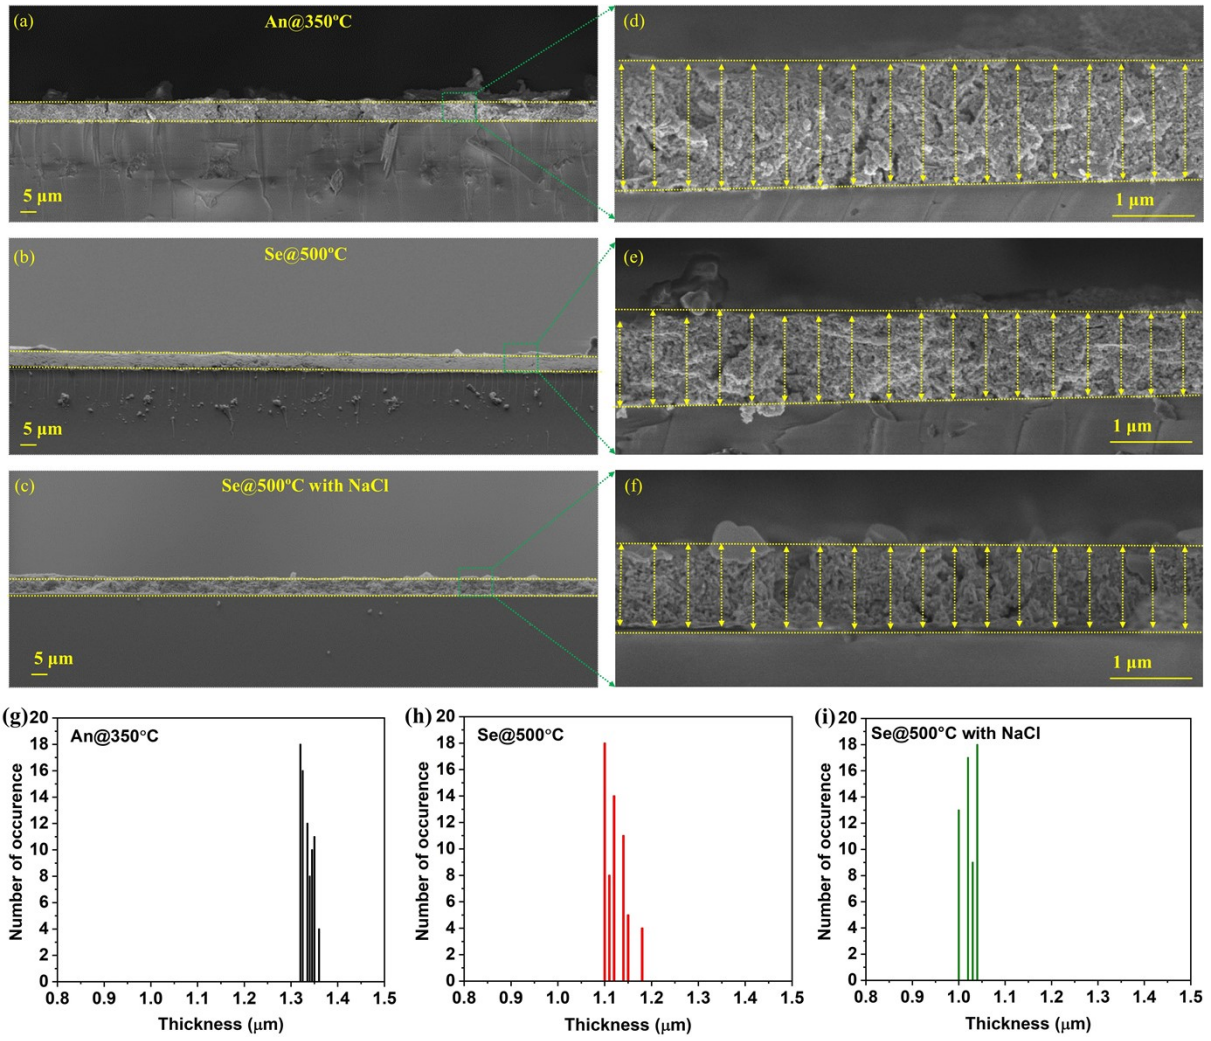

**Fig. S1.** (a-f) FESEM images of An@350°C, Se@500°C and Se@500°C with NaCl thin films at low and high magnifications and (g-i) corresponding thickness distribution.
